# Supplementary material for: Five miRNAs-mediated PIEZO2 downregulation, accompanied with activation of Hedgehog signaling pathway, predicts poor prognosis of breast cancer
Source: publisher site journal article supplement (doi:10.18632/aging.101934), 2019-05-06
Supplement: Supplementary file [file aging-v11i9-101934-supplementary-material-SD2.pdf]

## SUPPLEMENTARY MATERIAL

Please browse the links in Full Text version of this manuscript to see Supplementary Table S1.

**Table S1. Potential miRNAs that regulate PIEZO2 (Predicted by starBase database).**

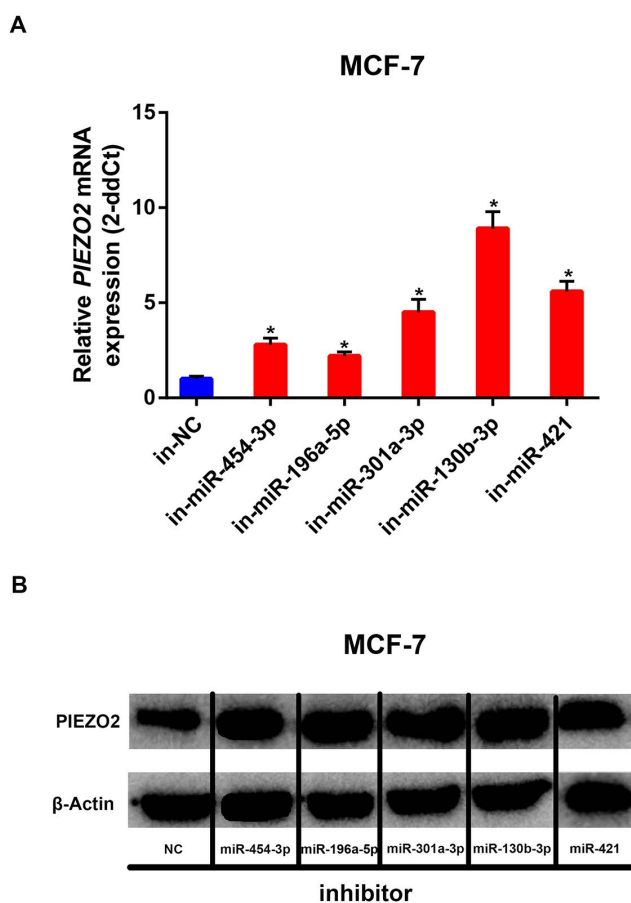

**Figure S1. PIEZO2 expression changes after knockdown of the five potential upstream miRNAs.** (A) The mRNA expression levels of PIEZO2 in MCF-7 treated with inhibitors for miR-454-3p, miR-196a-5p, miR-301a-3p, miR-130b-3p, miR-421 and negative control; (B) the protein expression levels of PIEZO2 in MCF-7 treated with inhibitors for miR-454-3p, miR-196a-5p, miR-301a-3p, miR-130b-3p, miR-421 and negative control. \* $P < 0.05$ . Errors bars indicate respective standard deviations.

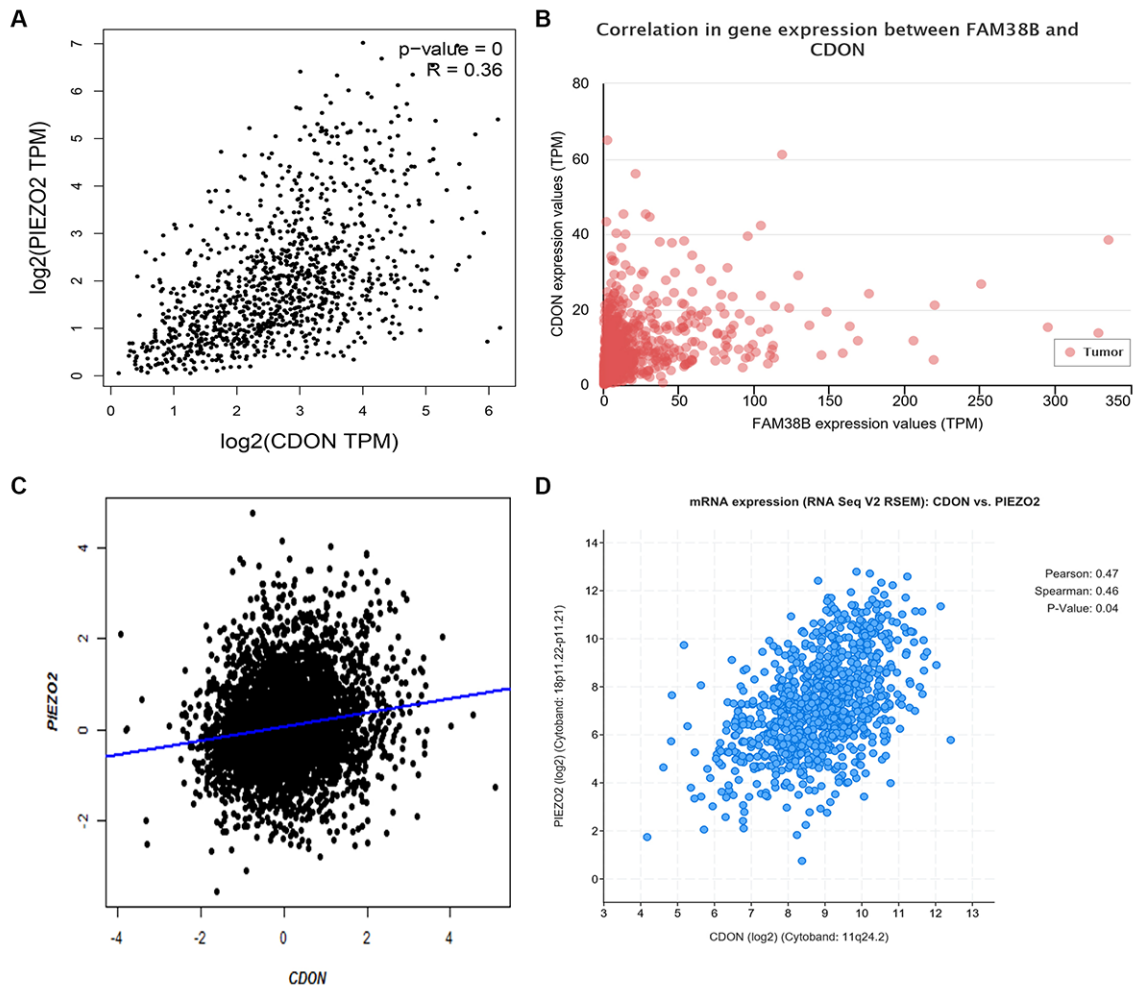

**Figure S2.** Correlation of PIEZO2 and CDON expression in breast cancer analyzed by GEPIA (A), UALCAN (B), bc-GenExMiner (C) and cBioPortal (D).

A

### Comparison of CDON Across 4 Analyses Under-expression

| Median Rank | p-Value | Gene |
|-------------|---------|------|
| 2624.5      | 2.25E-9 | CDON |

|   |   |   |   |
|---|---|---|---|
| 1 | 2 | 3 | 4 |
|---|---|---|---|

#### Legend

1. Invasive Breast Carcinoma vs. Normal  
*Gluck Breast, Breast Cancer Res Treat, 2011*
2. Invasive Breast Carcinoma vs. Normal  
*TCGA Breast, No Associated Paper, 2011*
3. Invasive Ductal Breast Carcinoma vs. Normal  
*TCGA Breast, No Associated Paper, 2011*
4. Invasive Lobular Breast Carcinoma vs. Normal  
*TCGA Breast, No Associated Paper, 2011*

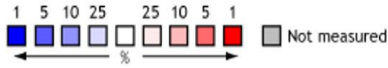

The rank for a gene is the median rank for that gene across each of the analyses.  
The p-Value for a gene is its p-Value for the median-ranked analysis.

B

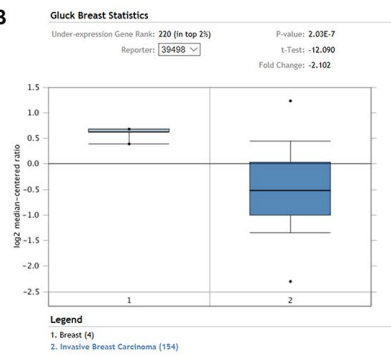

C

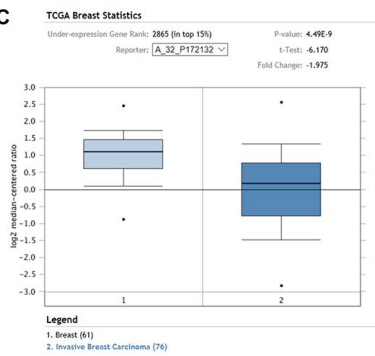

D

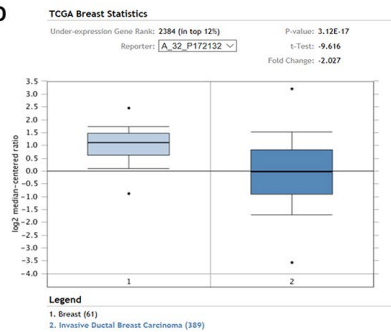

E

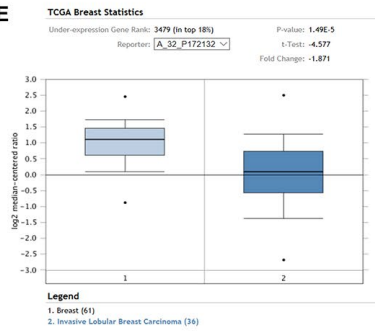

F

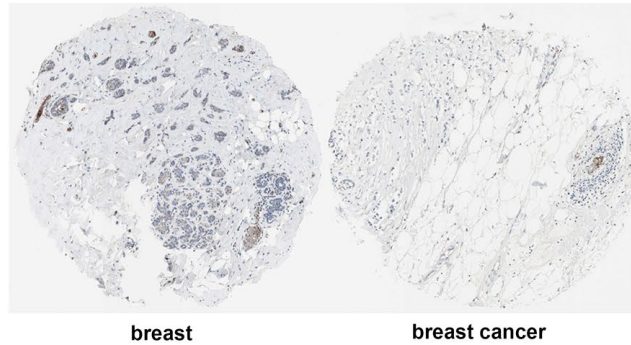

**Figure S3. Expression of CDON in breast cancer.** (A) Comprehensive meta-analysis of CDON expression across 4 datasets from Oncomine database; (B-E) comparison of CDON expression between breast cancer tissues and normal breast tissues in each of the four datasets; (F) CDON protein expression level in breast cancer tissue and normal breast tissue was analyzed using immunohistochemical staining from HumanProteinAtlas database.

**Table S2. Sequences of primers and siRNAs used in this study.**

| qRT-PCR primers |                | Sequences                 |
|-----------------|----------------|---------------------------|
| PIEZO2          | Forward primer | ATGGCCTCAGAAGTGGTGTG      |
| PIEZO2          | Reverse primer | ATGTCCTTGCATCGTCGTTTT     |
| CDON            | Forward primer | TATCTCATGGCTGCATAACGGA    |
| CDON            | Reverse primer | TGTCAGAGTCCCCTGATGAATC    |
| GAPDH           | Forward primer | AATGGACAACCTGGTCGTGGAC    |
| GAPDH           | Reverse primer | CCCTCCAGGGGATCTGTTTG      |
| siRNA           |                |                           |
| siRNA-PIEZO2    | Sense          | 5'-UAAUGUAAUUGGUCAACGA-3' |
|                 | Antisense      | 5'-UCGUUGACCAAUUACAUUA-3' |
| siRNA-CDON      | Sense          | 5'-GGAUCUUGGACCCUUAUGU-3' |
|                 | Antisense      | 5'-ACAUAAGGGUCCAAGAUC-3'  |
